# Supplementary material for: Enhanced Adsorptive Properties and Pseudocapacitance of Flexible Polyaniline-Activated Carbon Cloth Composites Synthesized Electrochemically in a Filter-Press Cell
Source: PubMed Central journal article supplement (PMC6719905; doi:10.3390/ma12162516), 2019-08-07
Supplement: materials-12-02516-s001.pdf [file materials-12-02516-s001.pdf]

## Supplementary Information

### Enhanced adsorptive properties and pseudocapacitance of hybrid Polyaniline-activated carbon cloth composites synthesized electrochemically in a filter-press cell

César Quijada <sup>1,\*</sup>, Larissa Leite Rosa <sup>1</sup>, Raúl Berenguer <sup>2</sup> and Eva Bou-Belda <sup>1</sup>

<sup>1</sup> Departamento de Ingeniería Textil y Papelera, Universitat Politècnica de València. Pza Ferrándiz y Carbonell, E-03801 Alcoy (Alicante). Spain.

<sup>2</sup> Instituto Universitario de Materiales, Departamento de Química Física. Universidad de Alicante (UA). Apartado 99. E-03080 Alicante (Spain).

\* Correspondence: cquijada@txp.upv.es; Tel.: +34-966-528-419

**Table S1.** Elemental surface composition (in at.%) of a fresh activated carbon cloth and hybrid PANi-ACC composite materials formed by galvanostatic electropolymerization at different electrolysis time.

| Time (min)                  | %C   | %O   | %N  | %S  |
|-----------------------------|------|------|-----|-----|
| 0 <sup>1</sup>              | 90.9 | 7.7  | 1.2 | 0.2 |
| Side in contact to anode    |      |      |     |     |
| 10                          | 80.4 | 14.6 | 2.4 | 2.6 |
| 20                          | 80.1 | 14.1 | 3.0 | 2.8 |
| 40                          | 81.7 | 13.2 | 2.9 | 2.2 |
| 60                          | 83.8 | 11.1 | 3.0 | 2.2 |
| 120                         | 68.2 | 16.5 | 9.4 | 5.9 |
| Side exposed to electrolyte |      |      |     |     |
| 10                          | 84.3 | 10.4 | 1.9 | 2.6 |
| 20                          | 82.9 | 11.7 | 2.8 | 2.6 |
| 40                          | 80.9 | 14.2 | 2.7 | 2.2 |
| 60                          | 83.8 | 11.9 | 2.0 | 2.4 |
| 120                         | 71.2 | 15.5 | 7.7 | 5.6 |

<sup>1</sup> Average of analyses conducted on both sides of the fabric.

**Table S2.** C1s and N1s peak positions and relative abundance (in at.%) after peak fitting.

| Time (min) | C1            |                 | C2                              |                           | C3                      |                                            |      |                                               |      |
|------------|---------------|-----------------|---------------------------------|---------------------------|-------------------------|--------------------------------------------|------|-----------------------------------------------|------|
|            | (-C=C-/-C-C-) |                 | (C-O/C-N/C=N/C=N <sup>+</sup> ) |                           | (C=O/C-N <sup>+</sup> ) |                                            |      |                                               |      |
|            | BE (eV)       | %               | BE (eV)                         | %                         | BE (eV)                 | %                                          |      |                                               |      |
| 0          | 284.8         | 83.2            | 286.4                           | 14.0                      | 288.2                   | 2.9                                        |      |                                               |      |
| 10         | 284.5         | 71.3            | 285.7                           | 23.1                      | 287.9                   | 5.6                                        |      |                                               |      |
| 20         | 284.5         | 66.1            | 285.7                           | 27.4                      | 287.9                   | 6.5                                        |      |                                               |      |
| 40         | 284.6         | 67.9            | 285.8                           | 25.7                      | 288.0                   | 6.4                                        |      |                                               |      |
| 60         | 284.6         | 68.6            | 285.6                           | 25.5                      | 287.8                   | 5.9                                        |      |                                               |      |
| 120        | 284.7         | 62.7            | 286.0                           | 27.6                      | 287.7                   | 9.7                                        |      |                                               |      |
|            |               | N1              |                                 | N2                        |                         | N3                                         |      | N4                                            |      |
|            |               | (pyridine, =N-) |                                 | (pyrrolic/pyridone, -NH-) |                         | (quaternary N, N <sup>+</sup> delocalized) |      | (pyridinic N-oxide, N <sup>+</sup> localized) |      |
|            |               | BE (eV)         | %                               | BE (eV)                   | %                       | BE (eV)                                    | %    | BE (eV)                                       | %    |
| 0          |               | 398.1           | 23.4                            | 399.9                     | 25.8                    | 400.7                                      | 41.9 | 401.7                                         | 8.9  |
| 10         |               | 398.1           | 6.2                             | 399.6                     | 28.8                    | 400.8                                      | 46.2 | 402.1                                         | 18.8 |
| 20         |               | 398.4           | 4.9                             | 399.7                     | 31.2                    | 400.6                                      | 50.3 | 402.2                                         | 13.5 |

|     |       |      |       |      |       |      |       |      |
|-----|-------|------|-------|------|-------|------|-------|------|
| 40  | 398.2 | 10.2 | 399.7 | 34.6 | 400.8 | 34.2 | 402.3 | 21.0 |
| 60  | 398.4 | 13.4 | 399.8 | 29.4 | 400.5 | 34.8 | 401.8 | 22.4 |
| 120 | 398.3 | 4.0  | 399.4 | 40.1 | 400.2 | 49.3 | 401.9 | 6.6  |

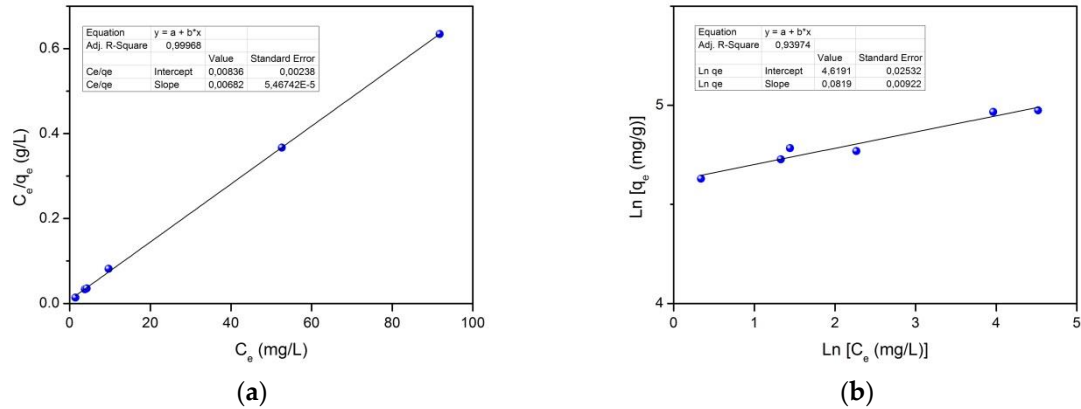

**Figure S1.** Isotherm linearized fittings for Acid Red 27 adsorbed on activated carbon cloth (adsorbent dose: 0.04 g, liquid phase volume: 50 mL, temperature: 25 °C) (a) Langmuir isotherm; (b) Freundlich isotherm.

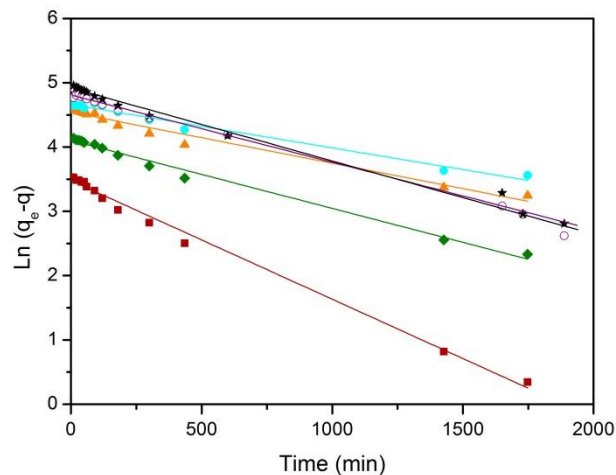

**Figure S2.** Pseudo-first order  $\ln (q_e - q)$  vs.  $t$  plots for the adsorption of Acid Red 27 on activated carbon cloth at different initial dye concentrations: 25 mg/L (■), 50 mg/L (◆), 75 mg/L (▲), 100 mg/L (●), 150 mg/L (○), 200 mg/L (★); adsorbent dose: 0.04 g, liquid phase volume: 50 mL, temperature: 25 °C.

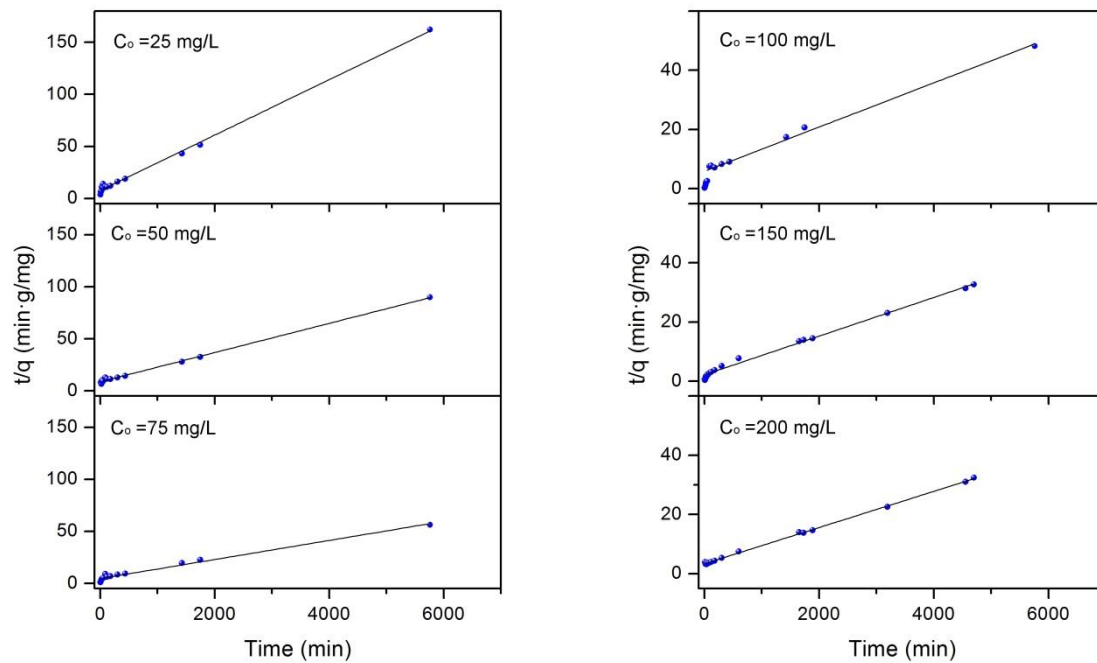

**Figure S3.** Pseudo-second order  $t/q$  vs.  $t$  plots for the adsorption of Acid Red 77 on activated carbon cloth at different initial dye concentrations; adsorbent dose: 0.04 g, liquid phase volume: 50 mL, temperature: 25 °C.

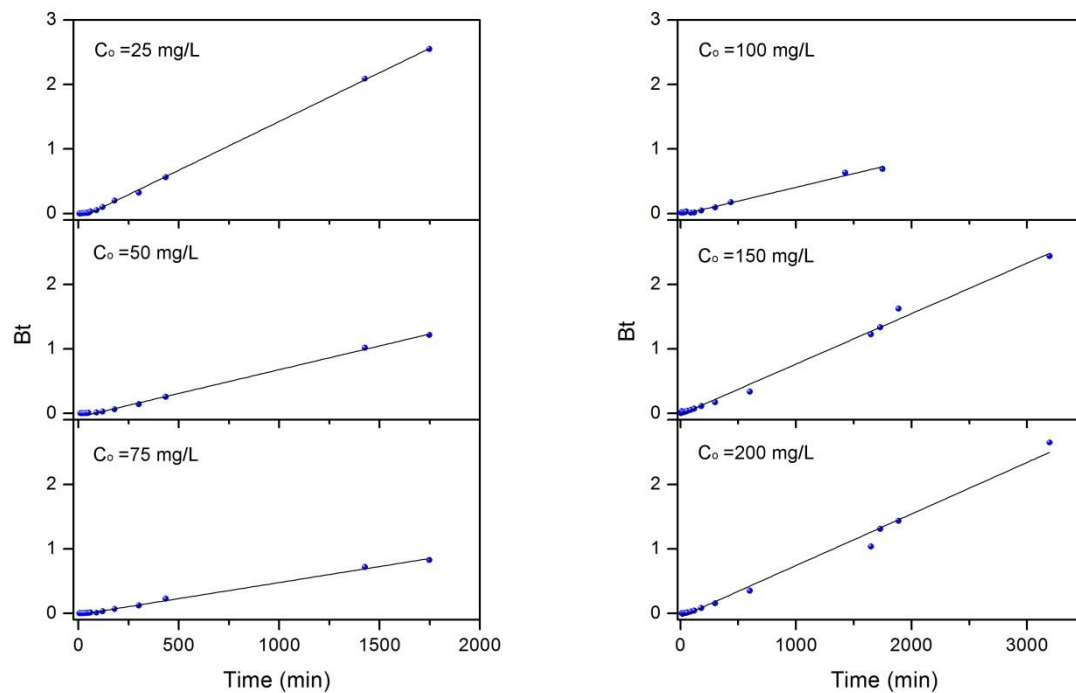

**Figure S4.** Boyd plots for the adsorption of Acid Red 77 on activated carbon cloth at different initial dye concentrations; adsorbent dose: 0.04 g, liquid phase volume: 50 mL, temperature: 25 °C.

**Table S3.** Boyd plot parameters for the adsorption of Acid Red 27 on ACC ( $C_0$ :  $\text{mg}\cdot\text{L}^{-1}$ ;  $B$ :  $\text{min}^{-1}$ ;  $D_e$ :  $\text{m}^2\text{ s}^{-1}$ ).

| $C_0$ | $B (\times 10^3)$ | Y-intercept | $R^2$ | $D_e (\times 10^{17})$ |
|-------|-------------------|-------------|-------|------------------------|
| 25    | 1.51              | -0.084      | 0.999 | 6.34                   |
| 50    | 0.74              | -0.066      | 0.999 | 3.14                   |
| 75    | 0.52              | -0.025      | 0.998 | 2.20                   |
| 100   | 0.43              | -0.027      | 0.993 | 1.82                   |
| 150   | 0.78              | -0.017      | 0.994 | 3.30                   |
| 200   | 0.80              | -0.057      | 0.990 | 3.38                   |

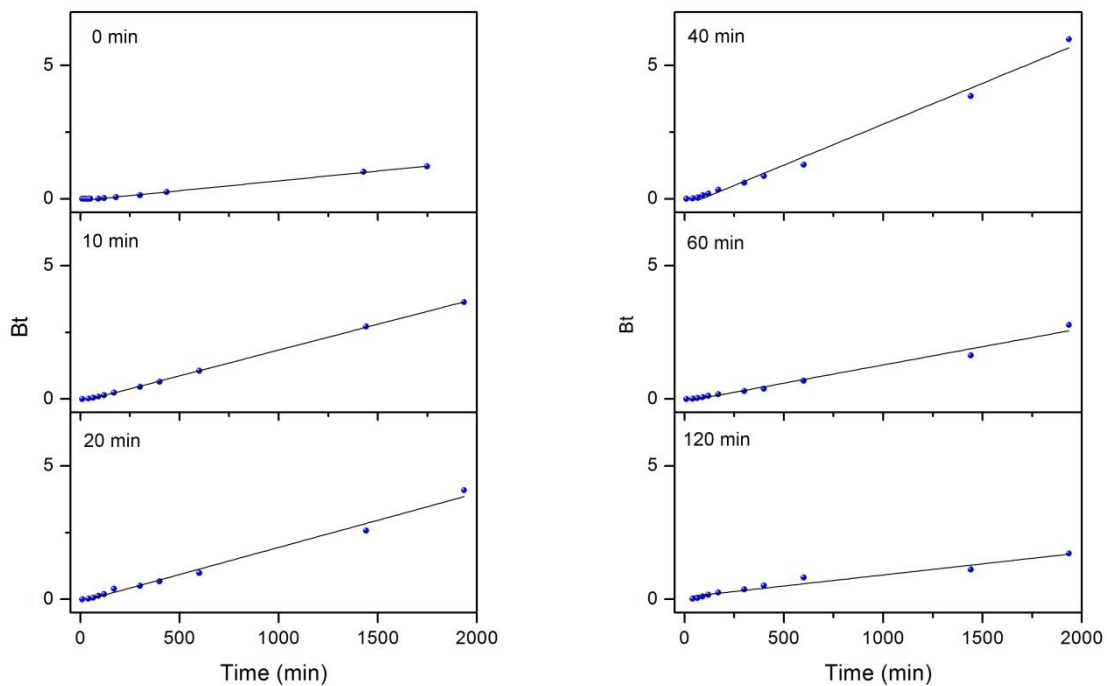**Figure S5.** Boyd plots for the adsorption of Acid Red 27 on hybrid PANi-ACC composites formed at different electropolymerization time; initial dye concentrations:  $50\text{ mg L}^{-1}$ ; adsorbent dose:  $0.04\text{ g}$ ; liquid phase volume:  $50\text{ mL}$ ; temperature:  $25\text{ }^\circ\text{C}$ .**Table S4.** Boyd plot parameters for the adsorption of Acid Red 27 ( $50\text{ mg L}^{-1}$ ) on hybrid PANi-ACC composites synthesized at different electropolymerization time (time: min;  $B$ :  $\text{min}^{-1}$ ;  $D_e$ :  $\text{m}^2\text{ s}^{-1}$ ).

| Time | $B (\times 10^3)$ | Y-intercept | $R^2$ | $D_e (\times 10^{17})$ |
|------|-------------------|-------------|-------|------------------------|
| 0    | 0.74              | -0.066      | 0.999 | 3.14                   |
| 10   | 1.93              | -0.096      | 0.999 | 8.16                   |
| 20   | 2.04              | -0.087      | 0.989 | 8.59                   |
| 40   | 3.06              | -0.262      | 0.990 | 12.9                   |
| 60   | 1.37              | -0.086      | 0.983 | 5.77                   |
| 120  | 0.08              | 0.087       | 0.957 | -                      |
